# Supplementary material for: Erlotinib is effective in pancreatic cancer with epidermal growth factor receptor mutations: a randomized, open-label, prospective trial
Source: PubMed Central journal article supplement (PMC4627242; doi:10.18632/oncotarget.4216), 2015-05-20
Supplement: oncotarget-06-18162-s001.pdf [file oncotarget-06-18162-s001.pdf]

# Erlotinib is effective in pancreatic cancer with epidermal growth factor receptor mutations: a randomized, open-label, prospective trial

## Supplementary Material

Supplementary Figure 1. DNA sequencing analysis of EGFR gene from exons 18 to 21.

Exon 18

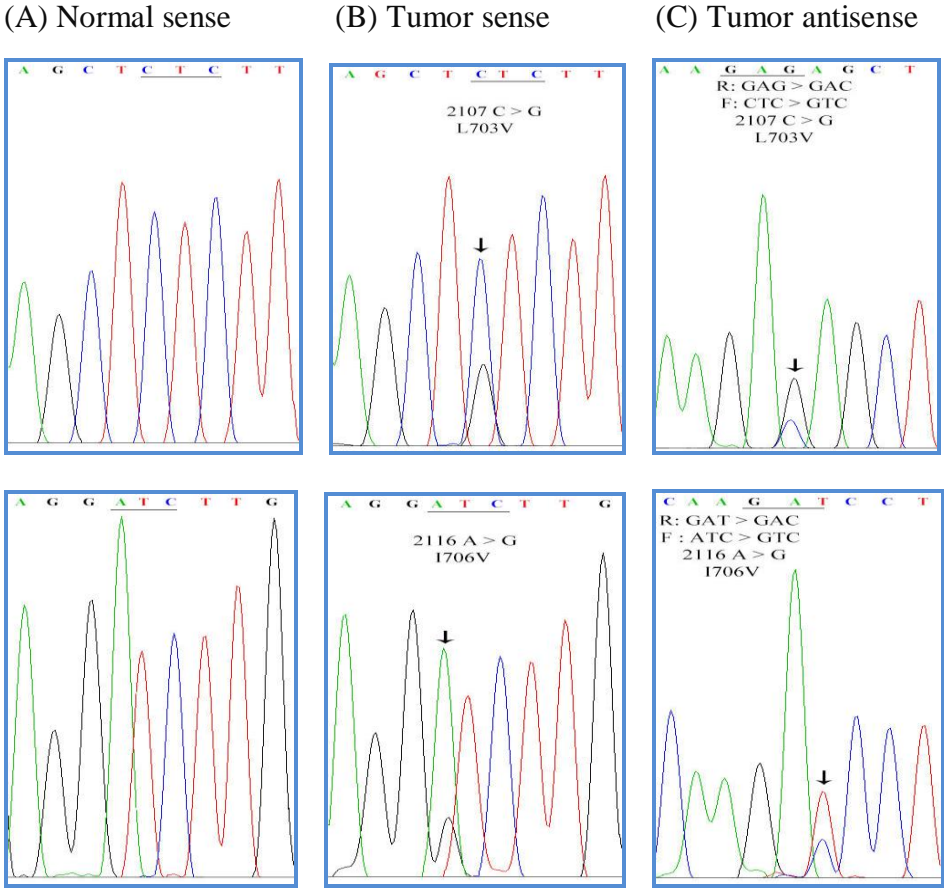

Exon 19

(A) Normal sense (B) Tumor sense (C) Tumor antisense

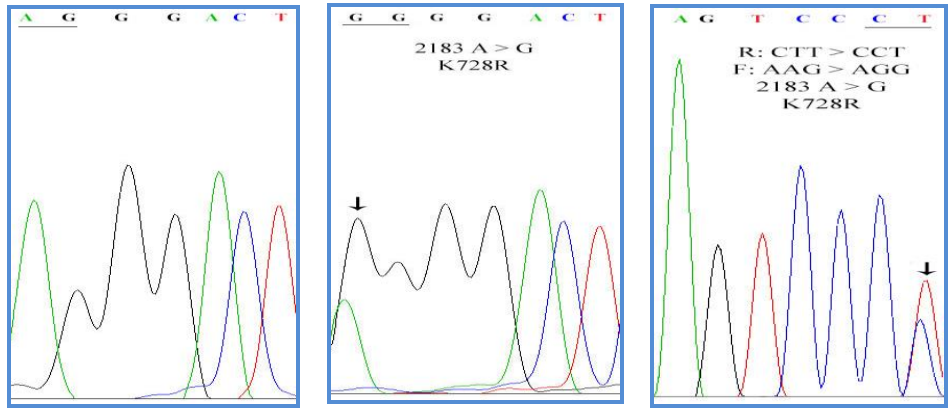

\*The peak of 2182A was not shown due to its position at exon 18.

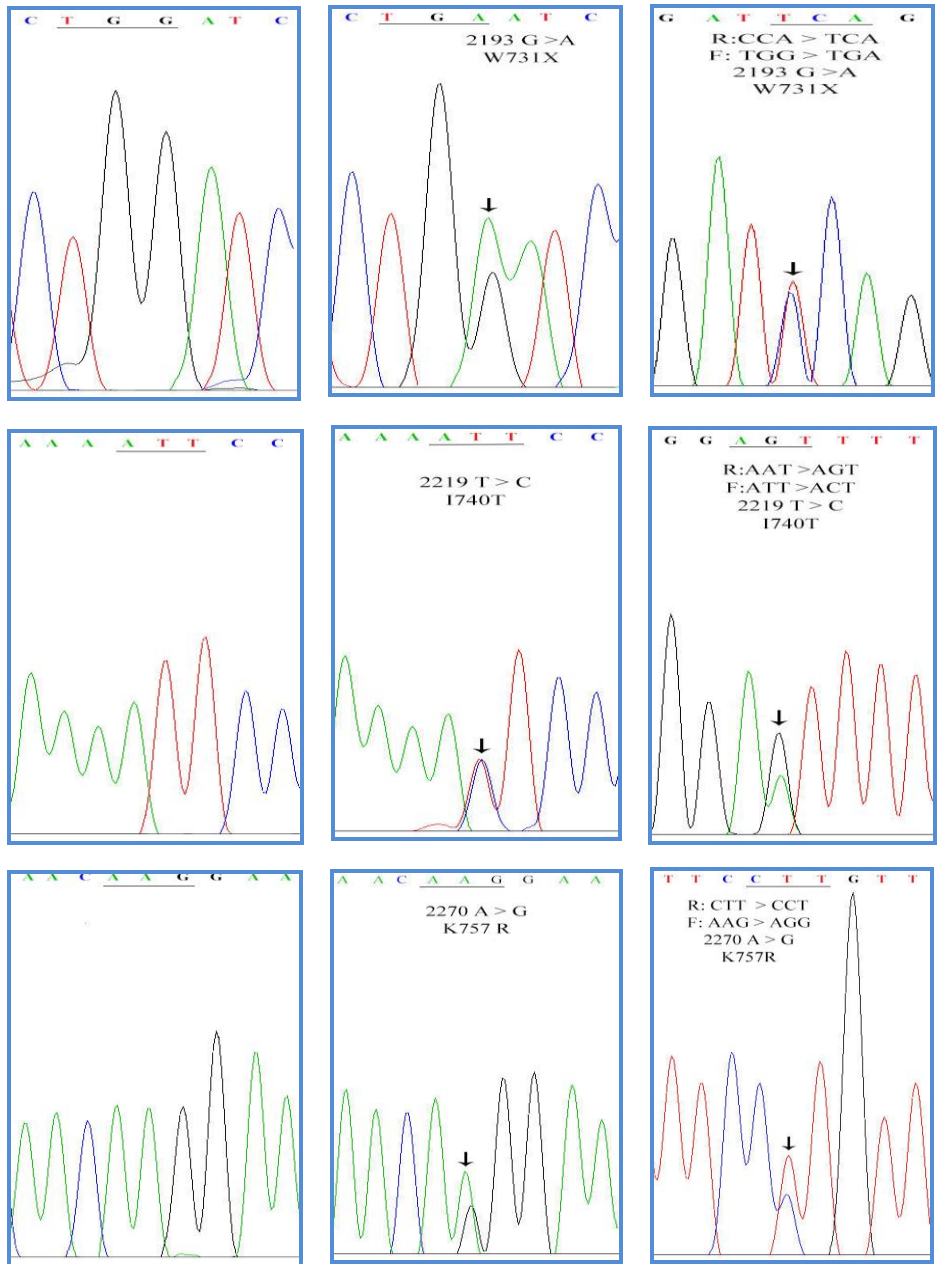

Exon 20

(A) Normal sense

(B) Tumor sense

(C) Tumor antisense

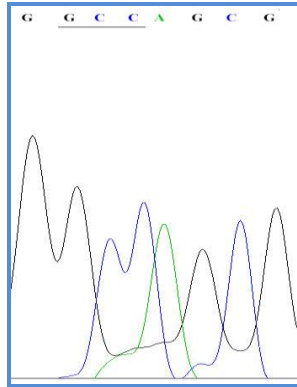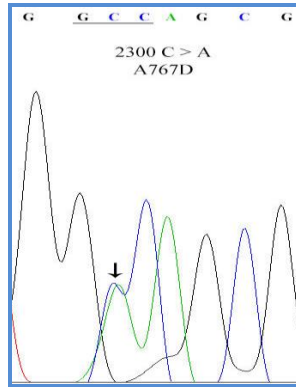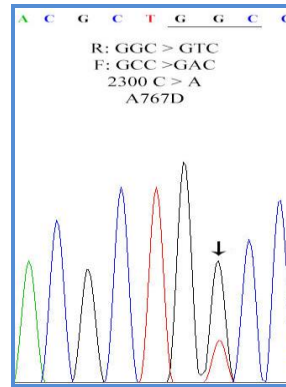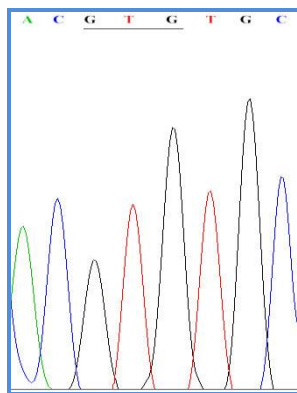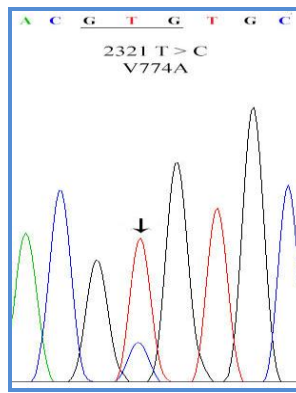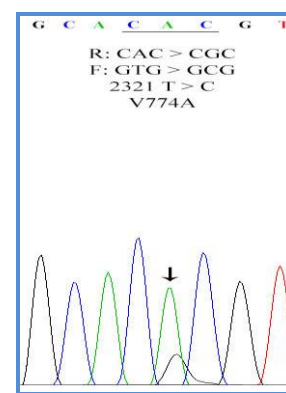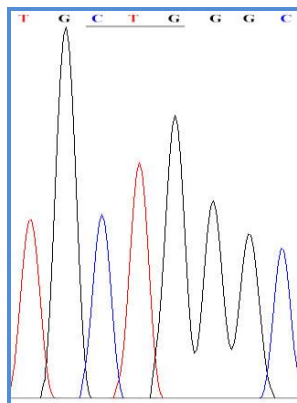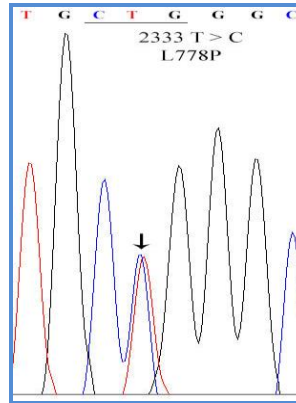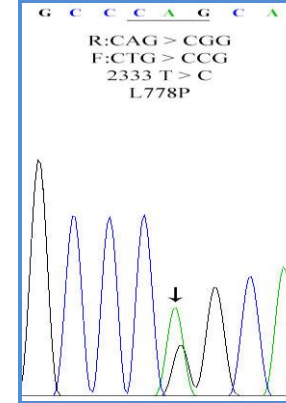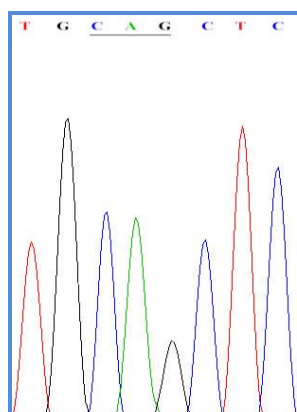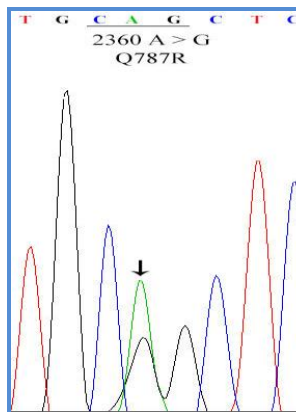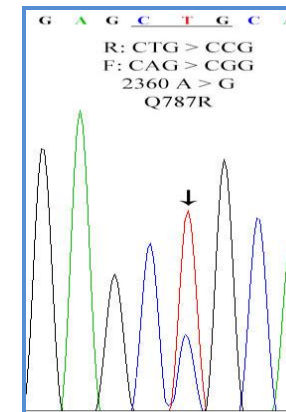

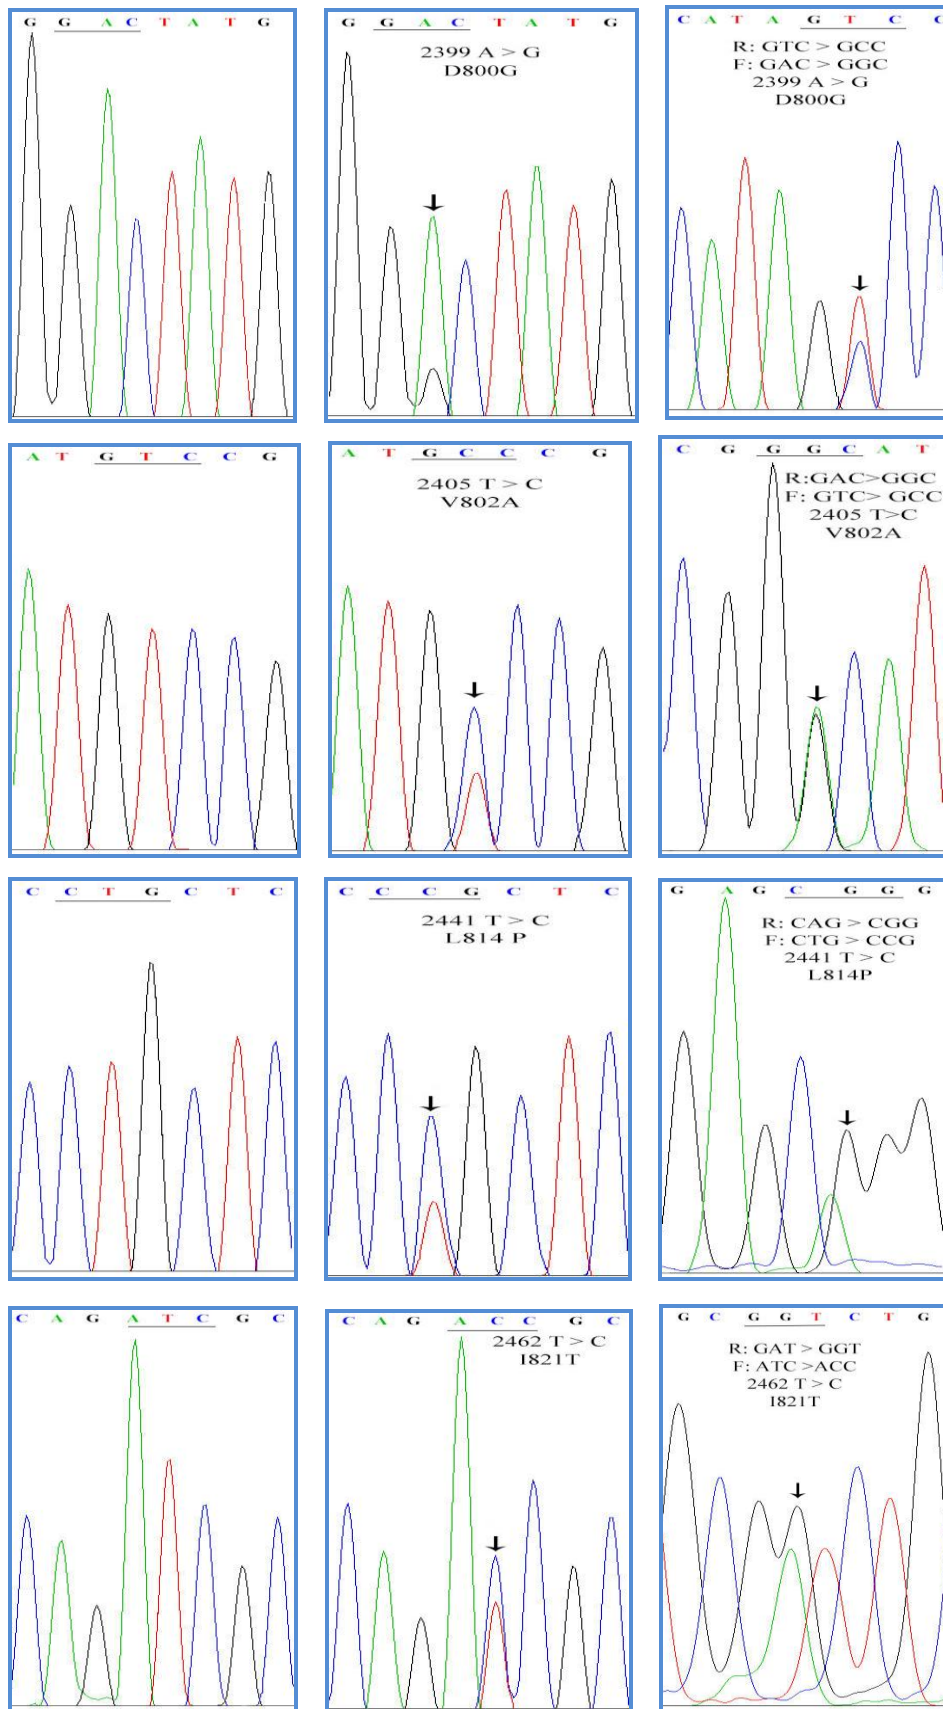

Exon 21

(A) Normal sense

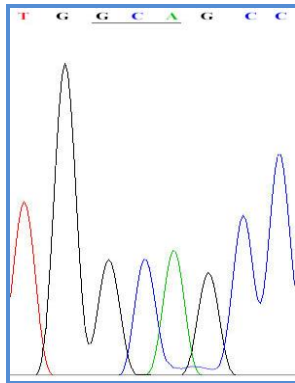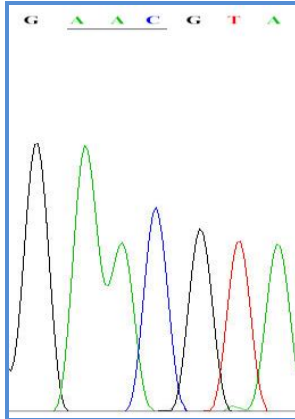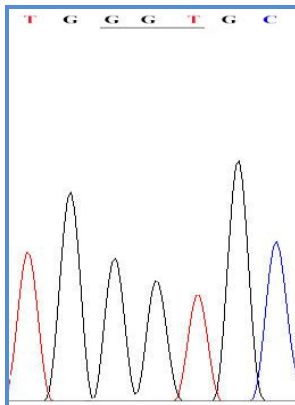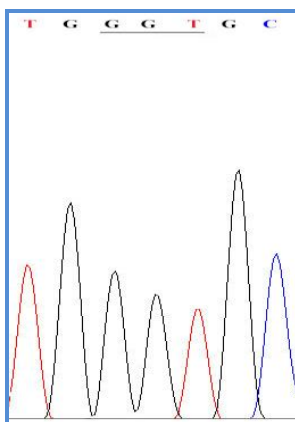

(B) Tumor sense

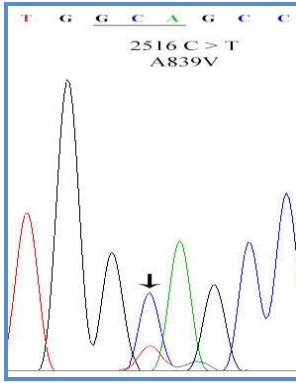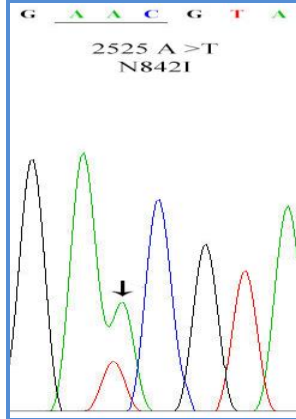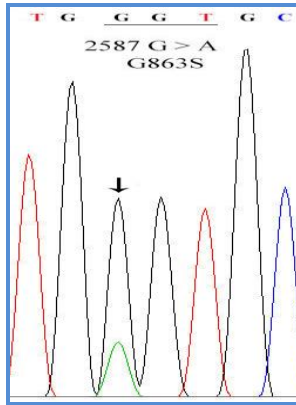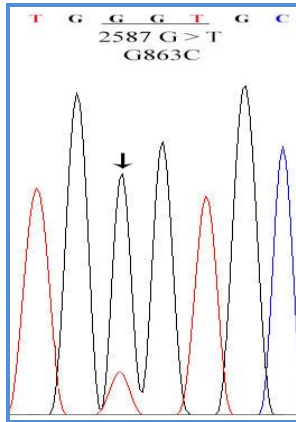

(C) Tumor antisense

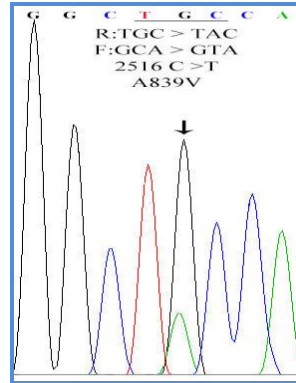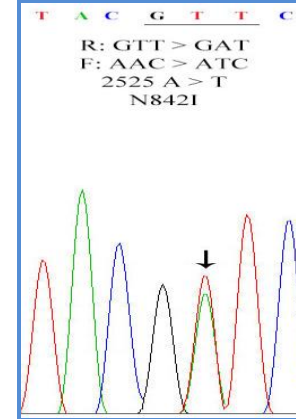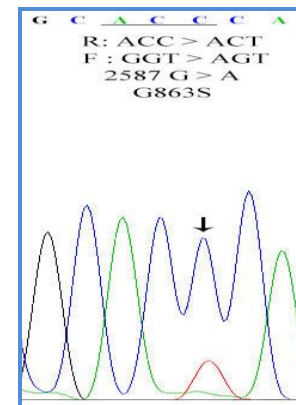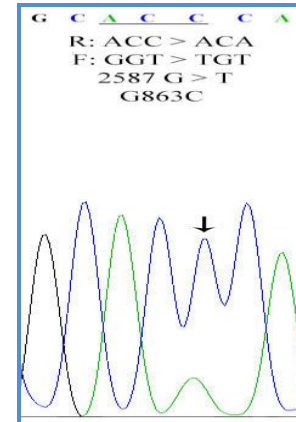



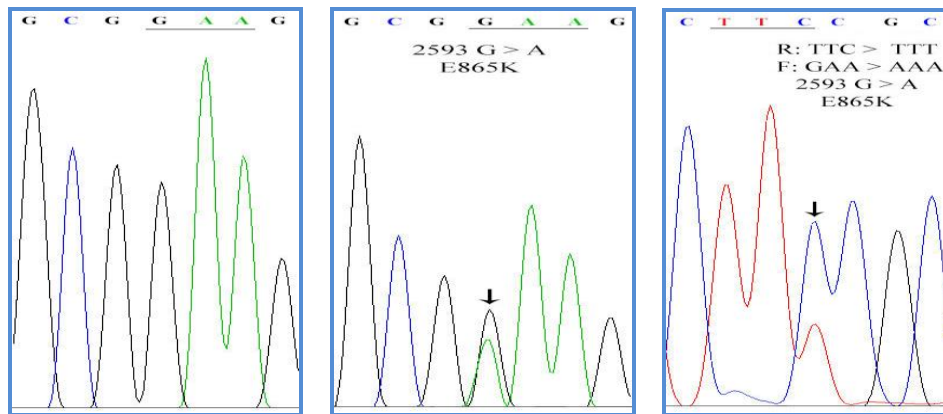

Arrows indicate nucleotide changes. F: forward direction. R: reverse direction.

**Supplementary Table 1.** Sequences of the primers used for polymerase chain reaction

| Gene                | Forward primer sequence | Reverse primer sequence |
|---------------------|-------------------------|-------------------------|
| <i>EGFR</i> exon 18 | GGCTGAGGTGACCCTTGTC     | CTGCGGCCAGCCCAGAG       |
| <i>EGFR</i> exon 19 | AGCATGTGGCACCATCTCAC    | GAGAAAAGGTGGGCCTGAGG    |
| <i>EGFR</i> exon 20 | ATGCGAAGCCACACTGACGT    | TGGTCCTTATCTCCCCTCC     |
| <i>EGFR</i> exon 21 | ATCTGTCCCTCACAGCAGG     | TCAGGAAAATGCTGGCTGA     |

**Supplementary Table 2.** Mutation pattern and treatment response in 49 pancreatic cancer patients with mutated *EGFR* genes

| Mutations  |            | No. (%)   | Response rate (%) |               |       | Disease control rate (%) |               |       |
|------------|------------|-----------|-------------------|---------------|-------|--------------------------|---------------|-------|
| Nucleotide | Amino acid |           | G<br>n = 23       | G+E<br>n = 26 | P     | G<br>n = 23              | G+E<br>n = 26 | P     |
| Exon 18    |            | 2 (3%)    |                   |               |       |                          |               |       |
| 2107C>G    | L703V      | 1 (2%)    | 0/1 (0%)          | -             |       | 1/1 (100%)               | -             |       |
| 2116A>G    | I706V      | 1 (2%)    | 0/1 (0%)          | -             |       | 0/1 (0%)                 | -             |       |
| Exon 19    |            | 23 (37%)  |                   |               |       |                          |               |       |
| 2183A>G    | K728R      | 12 (19%)  | 0/4 (0%)          | 1/8 (13%)     | 1.000 | 1/4 (25%)                | 7/8 (88%)     | 0.067 |
| 2193G>A    | W731X      | 8 (13%)   | 0/8 (0%)          | 1/1 (100%)    | 0.111 | 1/8 (13%)                | 1/1 (100%)    | 0.222 |
| 2219T>C    | I740T      | 2 (3%)    | -                 | 1/2 (50%)     |       | -                        | 2/2 (100%)    |       |
| 2270A>G    | K757R      | 1 (2%)    | 0/1 (0%)          | -             |       | 1/1 (100%)               | -             |       |
| Exon 20    |            | 31 (50%)  |                   |               |       |                          |               |       |
| 2300C>A    | A767D      | 1 (2%)    | 0/1 (0%)          | -             |       | 0/1 (0%)                 | -             |       |
| 2321T>C    | V774A      | 1 (2%)    | 0/1 (0%)          | -             |       | 0/1 (0%)                 | -             | -     |
| 2333T>C    | L778P      | 15 (24%)  | 0/8 (0%)          | 1/7 (14%)     | 0.467 | 0/8 (0%)                 | 5/7 (71%)     | 0.007 |
| 2360A>G    | Q787R      | 2 (3%)    | -                 | 0/2 (0%)      |       | -                        | 2/2 (100%)    |       |
| 2399A>G    | D800G      | 1 (2%)    | -                 | 0/1 (0%)      |       | -                        | 1/1 (100%)    |       |
| 2405T>C    | V802A      | 1 (2%)    | -                 | 0/1 (0%)      |       | -                        | 1/1 (100%)    |       |
| 2441T>C    | L814P      | 1 (2%)    | -                 | 0/1 (0%)      |       | -                        | 1/1 (100%)    |       |
| 2462T>C    | I821T      | 9 (15%)   | 1/4 (25%)         | 3/5 (60%)     | 0.524 | 3/4 (75%)                | 4/5 (80%)     | 1.000 |
| Exon 21    |            | 6 (10%)   |                   |               |       |                          |               |       |
| 2516C>T    | A839V      | 1 (2%)    | -                 | 1/1 (100%)    |       | -                        | 1/1 (100%)    |       |
| 2524A>T    | N842I      | 2 (3%)    | 0/1 (0%)          | 0/1 (0%)      | 1.000 | 0/1 (0%)                 | 1/1 (100%)    | 1.000 |
| 2587G>A    | G863S      | 1 (2%)    | 0/1 (0%)          | -             |       | 0/1 (0%)                 | -             |       |
| 2587G>T    | G863C      | 1 (2%)    | -                 | 0/1 (0%)      |       | -                        | 1/1 (100%)    |       |
| 2593G>A    | E865K      | 1 (2%)    | -                 | 0/1 (0%)      |       | -                        | 1/1 (100%)    |       |
| Total      |            | 62 (100%) |                   |               |       |                          |               |       |

Abbreviations: G, gemcitabine alone; G+E, gemcitabine plus erlotinib; X, stop codon.
